# Supplementary material for: Drug resistance gene expression and chemotherapy sensitivity detection in Chinese women with different molecular subtypes of breast cancer
Source: PubMed Central journal article supplement (PMC7721095; doi:10.20892/j.issn.2095-3941.2020.0157), 2020-12-15
Supplement: cbm-17-1014-s001.pdf [file cbm-17-1014-s001.pdf]

## Supplementary material

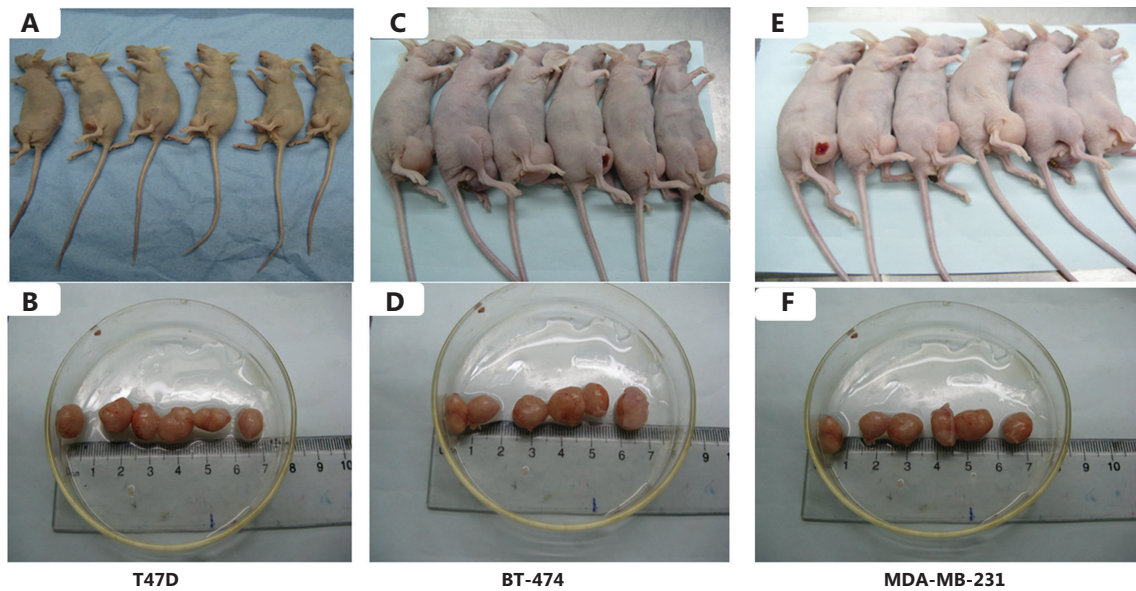

**Figure S1** BALB/c athymic nude mice were injected with  $5 \times 10^6$  (A, B) T47D, (C, D) BT-474, and (E, F) MDA-MB-231 cells into the left dorsal flank per mouse. BALB/c athymic nude mice were monitored for tumor development by weekly mammary gland palpation, and tumor volumes were determined using a caliper until the tumors reached a maximum volume of 2.5 cc (A, C, D). The tumor size according to the corresponding cell line was measured (B, E, F).
